# Supplementary material for: Exosome-mediated delivery of artificial circular RNAs for gene therapy of bladder cancer
Source: PubMed Central journal article supplement (PMC10869980; doi:10.7150/jca.90620), 2024-02-04
Supplement: jcav15p1770s1.pdf [file jcav15p1770s1.pdf]

Supplementary table 1: Sequence of primers used in this study

| name      | relative sequences (5'-3')                           |
|-----------|------------------------------------------------------|
| MYC       | F: GGCTCCTGGCAAAAGGTCA<br>R: CTGCGTAGTTGTGCTGATGT    |
| Cyclin D1 | F: GCTGCGAAGTGGAAACCATC<br>R: CCTCCTTCTGCACACATTTGAA |
| TRAF1     | F: TCCTGTGGAAGATCACCAATGT<br>R: GCAGGCACAACCTTGTAGCC |
| BclXL     | F: GAGCTGGTGGTTGACTTTCTC<br>R: TCCATCTCCGATTCAGTCCCT |
| acircRNA  | F: GGTTCCGGTCATGTGTGTGG<br>R: CGGACCAGGTACTCATGCATCC |
